# Supplementary material for: When it's hot and dry: life-history strategy influences the effects of heat waves and water limitation
Source: Oxford University Press journal article supplement (doi:10.1242/jeb.236398), 2021-03-10
Supplement: jeb236398supp.pdf [file jeb236398supp.pdf]

**Tables:**

Table S1

Results for the main and interactive effects of morph, sex, and treatment (water and temperature) on (A) survivorship (binary logistic generalized linear model; n=1001) and (B) total water content (% of live mass; mixed model; n=393) in adult *G. lineaticeps*. Initial body mass was included as a covariate for survival analysis. Significant effects are bolded.

**A. Survivorship**

|                                   | Wald Chi-Square | df       | P                |
|-----------------------------------|-----------------|----------|------------------|
| Morph                             | 0.89            | 1        | 0.35             |
| Sex                               | 0.71            | 1        | 0.40             |
| Water Treatment                   | 2.3             | 1        | 0.13             |
| <b>Temperature Treatment</b>      | <b>6.1</b>      | <b>1</b> | <b>0.013</b>     |
| Water * Temperature               | 0.042           | 1        | 0.84             |
| <b>Morph * Sex</b>                | <b>3.9</b>      | <b>1</b> | <b>0.048</b>     |
| Morph * Water                     | 2.3             | 1        | 0.13             |
| Morph * Temperature               | 0.012           | 1        | 0.91             |
| Sex * Water                       | 3.4             | 1        | 0.066            |
| Sex * Temperature                 | 0.79            | 1        | 0.38             |
| Morph * Sex * Water               | 0.20            | 1        | 0.66             |
| Morph * Sex * Temperature         | 0.20            | 1        | 0.65             |
| Morph * Water * Temperature       | 0.054           | 1        | 0.82             |
| Sex * Water * Temperature         | 0.39            | 1        | 0.53             |
| Morph * Sex * Water * Temperature | 0.48            | 1        | 0.49             |
| <b>Initial Body Mass</b>          | <b>45</b>       | <b>1</b> | <b>&lt;0.001</b> |

**B. Total Water Content**

|                                   | F          | df            | P                |
|-----------------------------------|------------|---------------|------------------|
| <b>Morph</b>                      | <b>96</b>  | <b>1, 375</b> | <b>&lt;0.001</b> |
| <b>Sex</b>                        | <b>8.9</b> | <b>1, 375</b> | <b>0.003</b>     |
| <b>Water Treatment</b>            | <b>154</b> | <b>1, 375</b> | <b>&lt;0.001</b> |
| <b>Temperature Treatment</b>      | <b>13</b>  | <b>1, 375</b> | <b>&lt;0.001</b> |
| <b>Water * Temperature</b>        | <b>4.1</b> | <b>1, 375</b> | <b>0.044</b>     |
| Morph * Sex                       | 0.18       | 1, 375        | 0.67             |
| Morph * Water                     | 0.15       | 1, 375        | 0.7              |
| Morph * Temperature               | 0.63       | 1, 375        | 0.43             |
| Sex * Water                       | 0.31       | 1, 375        | 0.56             |
| Sex * Temperature                 | 1.2        | 1, 375        | 0.27             |
| Morph * Sex * Water               | 0          | 1, 375        | 0.99             |
| Morph * Sex * Temperature         | 0.002      | 1, 375        | 0.96             |
| Morph * Water * Temperature       | 0.013      | 1, 375        | 0.91             |
| Sex * Water * Temperature         | 1.6        | 1, 375        | 0.2              |
| Morph * Sex * Water * Temperature | 0.002      | 1, 375        | 0.97             |

Table S2

Results for the main and interactive effects of morph, sex, and treatment (water and temperature) on (A) final body mass (mixed model; n=284), (B) dry gonad mass (mixed model; n=265), and (C) flight muscle status (ordinal logistic generalized linear mixed model; n=273) in adult *G. lineaticeps*. Initial body mass was included as a covariate for final body mass and dry gonad mass analysis. Significant effects are bolded.

A. Final Body Mass

|                                       | F           | df            | P                |
|---------------------------------------|-------------|---------------|------------------|
| Morph-DLM                             | 1.9         | 1, 244        | 0.15             |
| <b>Sex</b>                            | <b>3.9</b>  | <b>1, 244</b> | <b>0.046</b>     |
| <b>Water Treatment</b>                | <b>170</b>  | <b>1, 244</b> | <b>&lt;0.001</b> |
| <b>Temperature Treatment</b>          | <b>45</b>   | <b>1, 244</b> | <b>&lt;0.001</b> |
| <b>Water * Temperature</b>            | <b>15</b>   | <b>1, 244</b> | <b>&lt;0.001</b> |
| Morph-DLM * Sex                       | 0.93        | 1, 244        | 0.40             |
| <b>Morph-DLM * Water</b>              | <b>4.1</b>  | <b>1, 244</b> | <b>0.018</b>     |
| Morph-DLM * Temperature               | 2.0         | 1, 244        | 0.14             |
| Sex * Water                           | 2.5         | 1, 244        | 0.12             |
| Sex * Temperature                     | 0.13        | 1, 244        | 0.72             |
| Morph-DLM * Sex * Water               | 0.048       | 1, 244        | 0.95             |
| Morph-DLM * Sex * Temperature         | 0.26        | 1, 244        | 0.77             |
| Morph-DLM * Water * Temperature       | 0.98        | 1, 244        | 0.38             |
| Sex * Water * Temperature             | 0.20        | 1, 244        | 0.64             |
| Morph-DLM * Sex * Water * Temperature | 0.25        | 1, 244        | 0.78             |
| <b>Initial Body Mass</b>              | <b>1325</b> | <b>1, 244</b> | <b>&lt;0.001</b> |

B. Dry Gonad Mass

|                                 | F          | df            | P                |
|---------------------------------|------------|---------------|------------------|
| Morph-DLM                       | 2.5        | 1, 221        | 0.08             |
| <b>Sex</b>                      | <b>128</b> | <b>1, 221</b> | <b>&lt;0.001</b> |
| Water Treatment                 | 1.7        | 1, 221        | 0.197            |
| Temperature Treatment           | 0.35       | 1, 221        | 0.56             |
| Water * Temperature             | 0.34       | 1, 221        | 0.55             |
| Morph-DLM * Sex                 | 1.9        | 1, 221        | 0.16             |
| Morph-DLM * Water               | 0.47       | 1, 221        | 0.62             |
| Morph-DLM * Temperature         | 2.5        | 1, 221        | 0.086            |
| Sex * Water                     | 0.69       | 1, 221        | 0.41             |
| Sex * Temperature               | 1          | 1, 221        | 0.31             |
| Morph-DLM * Sex * Water         | 0.14       | 1, 221        | 0.87             |
| Morph-DLM * Sex * Temperature   | 1.76       | 1, 221        | 0.18             |
| Morph-DLM * Water * Temperature | 0.46       | 1, 221        | 0.63             |
| Sex * Water * Temperature       | 0.36       | 1, 221        | 0.55             |

|                                       |           |               |                  |
|---------------------------------------|-----------|---------------|------------------|
| Morph-DLM * Sex * Water * Temperature | 2.3       | 1, 221        | 0.11             |
| <b>Initial Body Mass</b>              | <b>39</b> | <b>1, 221</b> | <b>&lt;0.001</b> |

C. Flight Muscle Status

|                                   | Wald Chi-Square | df       | P                |
|-----------------------------------|-----------------|----------|------------------|
| <b>Morph</b>                      | <b>99</b>       | <b>1</b> | <b>&lt;0.001</b> |
| Sex                               | 0.37            | 1        | 0.54             |
| Water Treatment                   | 0.98            | 1        | 0.32             |
| Temperature Treatment             | 3.0             | 1        | 0.081            |
| Water * Temperature               | 0.67            | 1        | 0.41             |
| Morph * Sex                       | 1.5             | 1        | 0.22             |
| Morph * Water                     | 0.67            | 1        | 0.41             |
| Morph * Temperature               | 0.010           | 1        | 0.92             |
| Sex * Water                       | 3.0             | 1        | 0.09             |
| Sex * Temperature                 | 0.19            | 1        | 0.66             |
| Morph * Sex * Water               | 0.16            | 1        | 0.69             |
| Morph * Sex * Temperature         | 1.5             | 1        | 0.23             |
| Morph * Water * Temperature       | 0.47            | 1        | 0.49             |
| Sex * Water * Temperature         | 0.057           | 1        | 0.81             |
| Morph * Sex * Water * Temperature | 0.083           | 1        | 0.77             |

Table S3

Mixed model results for the main and interactive effects of morph, sex, and treatment (water and temperature) on (A) metabolic rate ( $\dot{V}\text{CO}_2$ ; n=190) and (B) evaporative water loss rate ( $\dot{V}\text{H}_2\text{O}$ ; n=190) at 28°C in adult *G. lineaticeps*. Final body mass was included as a covariate. Significant effects are bolded.

A.  $\dot{V}\text{CO}_2$ 

|                                   | <b>F</b>   | <b>df</b>     | <b>P</b>         |
|-----------------------------------|------------|---------------|------------------|
| <b>Morph</b>                      | <b>10</b>  | <b>1, 167</b> | <b>0.0016</b>    |
| <b>Sex</b>                        | <b>7.5</b> | <b>1, 167</b> | <b>0.0067</b>    |
| Water Treatment                   | 1.4        | 1, 167        | 0.23             |
| Temperature Treatment             | 1.6        | 1, 167        | 0.21             |
| <b>Water * Temperature</b>        | <b>4.6</b> | <b>1, 167</b> | <b>0.041</b>     |
| Morph * Sex                       | 0.89       | 1, 167        | 0.35             |
| Morph * Water                     | 0.22       | 1, 167        | 0.64             |
| Morph * Temperature               | 0.0065     | 1, 167        | 0.94             |
| Sex * Water                       | 0.23       | 1, 167        | 0.63             |
| Sex * Temperature                 | 0.52       | 1, 167        | 0.47             |
| Morph * Sex * Water               | 1.2        | 1, 167        | 0.28             |
| Morph * Sex * Temperature         | 0.96       | 1, 167        | 0.33             |
| Morph * Water * Temperature       | 0.0045     | 1, 167        | 0.95             |
| Sex * Water * Temperature         | 0.37       | 1, 167        | 0.55             |
| Morph * Sex * Water * Temperature | 1.3        | 1, 167        | 0.26             |
| <b>Final Body Mass</b>            | <b>31</b>  | <b>1, 167</b> | <b>&lt;0.001</b> |

B.  $\dot{V}\text{H}_2\text{O}$ 

|                                   | <b>F</b>   | <b>df</b>     | <b>P</b>     |
|-----------------------------------|------------|---------------|--------------|
| Morph                             | 1.7        | 1, 162        | 0.20         |
| Sex                               | 0.74       | 1, 162        | 0.39         |
| Water Treatment                   | 2.4        | 1, 162        | 0.12         |
| Temperature Treatment             | 0.022      | 1, 162        | 0.88         |
| Water * Temperature               | 0.58       | 1, 162        | 0.45         |
| Morph * Sex                       | 0.38       | 1, 162        | 0.54         |
| Morph * Water                     | 0.27       | 1, 162        | 0.60         |
| Morph * Temperature               | 0.29       | 1, 162        | 0.59         |
| Sex * Water                       | 0.85       | 1, 162        | 0.36         |
| Sex * Temperature                 | 0.026      | 1, 162        | 0.87         |
| Morph * Sex * Water               | 0.0018     | 1, 162        | 0.97         |
| Morph * Sex * Temperature         | 0.025      | 1, 162        | 0.87         |
| Morph * Water * Temperature       | 0.32       | 1, 162        | 0.57         |
| Sex * Water * Temperature         | 0.92       | 1, 162        | 0.34         |
| Morph * Sex * Water * Temperature | 0.014      | 1, 162        | 0.91         |
| <b>Final Body Mass</b>            | <b>4.6</b> | <b>1, 162</b> | <b>0.034</b> |

Table S4

Mixed model results for the main and interactive effects of morph, sex, and treatment (water and temperature) on (A) boldness (n=264) and (B) on total phenoloxidase activity (n=148) in adult *G. lineaticeps*. Total protein content was included as a covariate for total phenoloxidase activity analysis. Significant effect is bolded.

#### A. Boldness

|                                    | <b>F</b>   | <b>df</b>     | <b>P</b>     |
|------------------------------------|------------|---------------|--------------|
| Morph                              | 0.99       | 1, 245        | 0.32         |
| Sex                                | 1.5        | 1, 245        | 0.22         |
| Water Treatment                    | 0.57       | 1, 245        | 0.45         |
| Temperature Treatment              | 0.45       | 1, 245        | 0.51         |
| Water * Temperature                | 2.9        | 1, 245        | 0.089        |
| Morph * Sex                        | 0.20       | 1, 245        | 0.65         |
| Morph * Water                      | 0.30       | 1, 245        | 0.59         |
| Morph * Temperature                | 0.046      | 1, 245        | 0.83         |
| Sex * Water                        | 1.8        | 1, 245        | 0.18         |
| Sex * Temperature                  | 0.24       | 1, 245        | 0.63         |
| Morph * Sex * Water                | 0.52       | 1, 245        | 0.47         |
| Morph * Sex * Temperature          | 0.054      | 1, 245        | 0.82         |
| <b>Morph * Water * Temperature</b> | <b>4.0</b> | <b>1, 245</b> | <b>0.048</b> |
| Sex * Water * Temperature          | 0.0081     | 1, 245        | 0.93         |
| Morph * Sex * Water * Temperature  | 0.47       | 1, 245        | 0.49         |

#### B. Total Phenoloxidase Activity

|                             | <b>F</b>   | <b>df</b>     | <b>P</b>     |
|-----------------------------|------------|---------------|--------------|
| Morph                       | 0.018      | 1, 142        | 0.89         |
| Water Treatment             | 1.3        | 1, 142        | 0.26         |
| Temperature Treatment       | 2.8        | 1, 142        | 0.10         |
| Water * Temperature         | 0.23       | 1, 142        | 0.63         |
| Morph * Water               | 0.53       | 1, 142        | 0.47         |
| <b>Morph * Temperature</b>  | <b>4.3</b> | <b>1, 142</b> | <b>0.044</b> |
| Morph * Water * Temperature | 0.42       | 1, 142        | 0.52         |
| Total Protein Content       | 1.5        | 1, 142        | 0.23         |
